# Supplementary material for: FACT regulates pluripotency through proximal and distal regulation of gene expression in murine embryonic stem cells
Source: PubMed Central journal article supplement (PMC10403911; doi:10.1186/s12915-023-01669-0), 2023-08-04

Figure 1B (V5-SPT16)

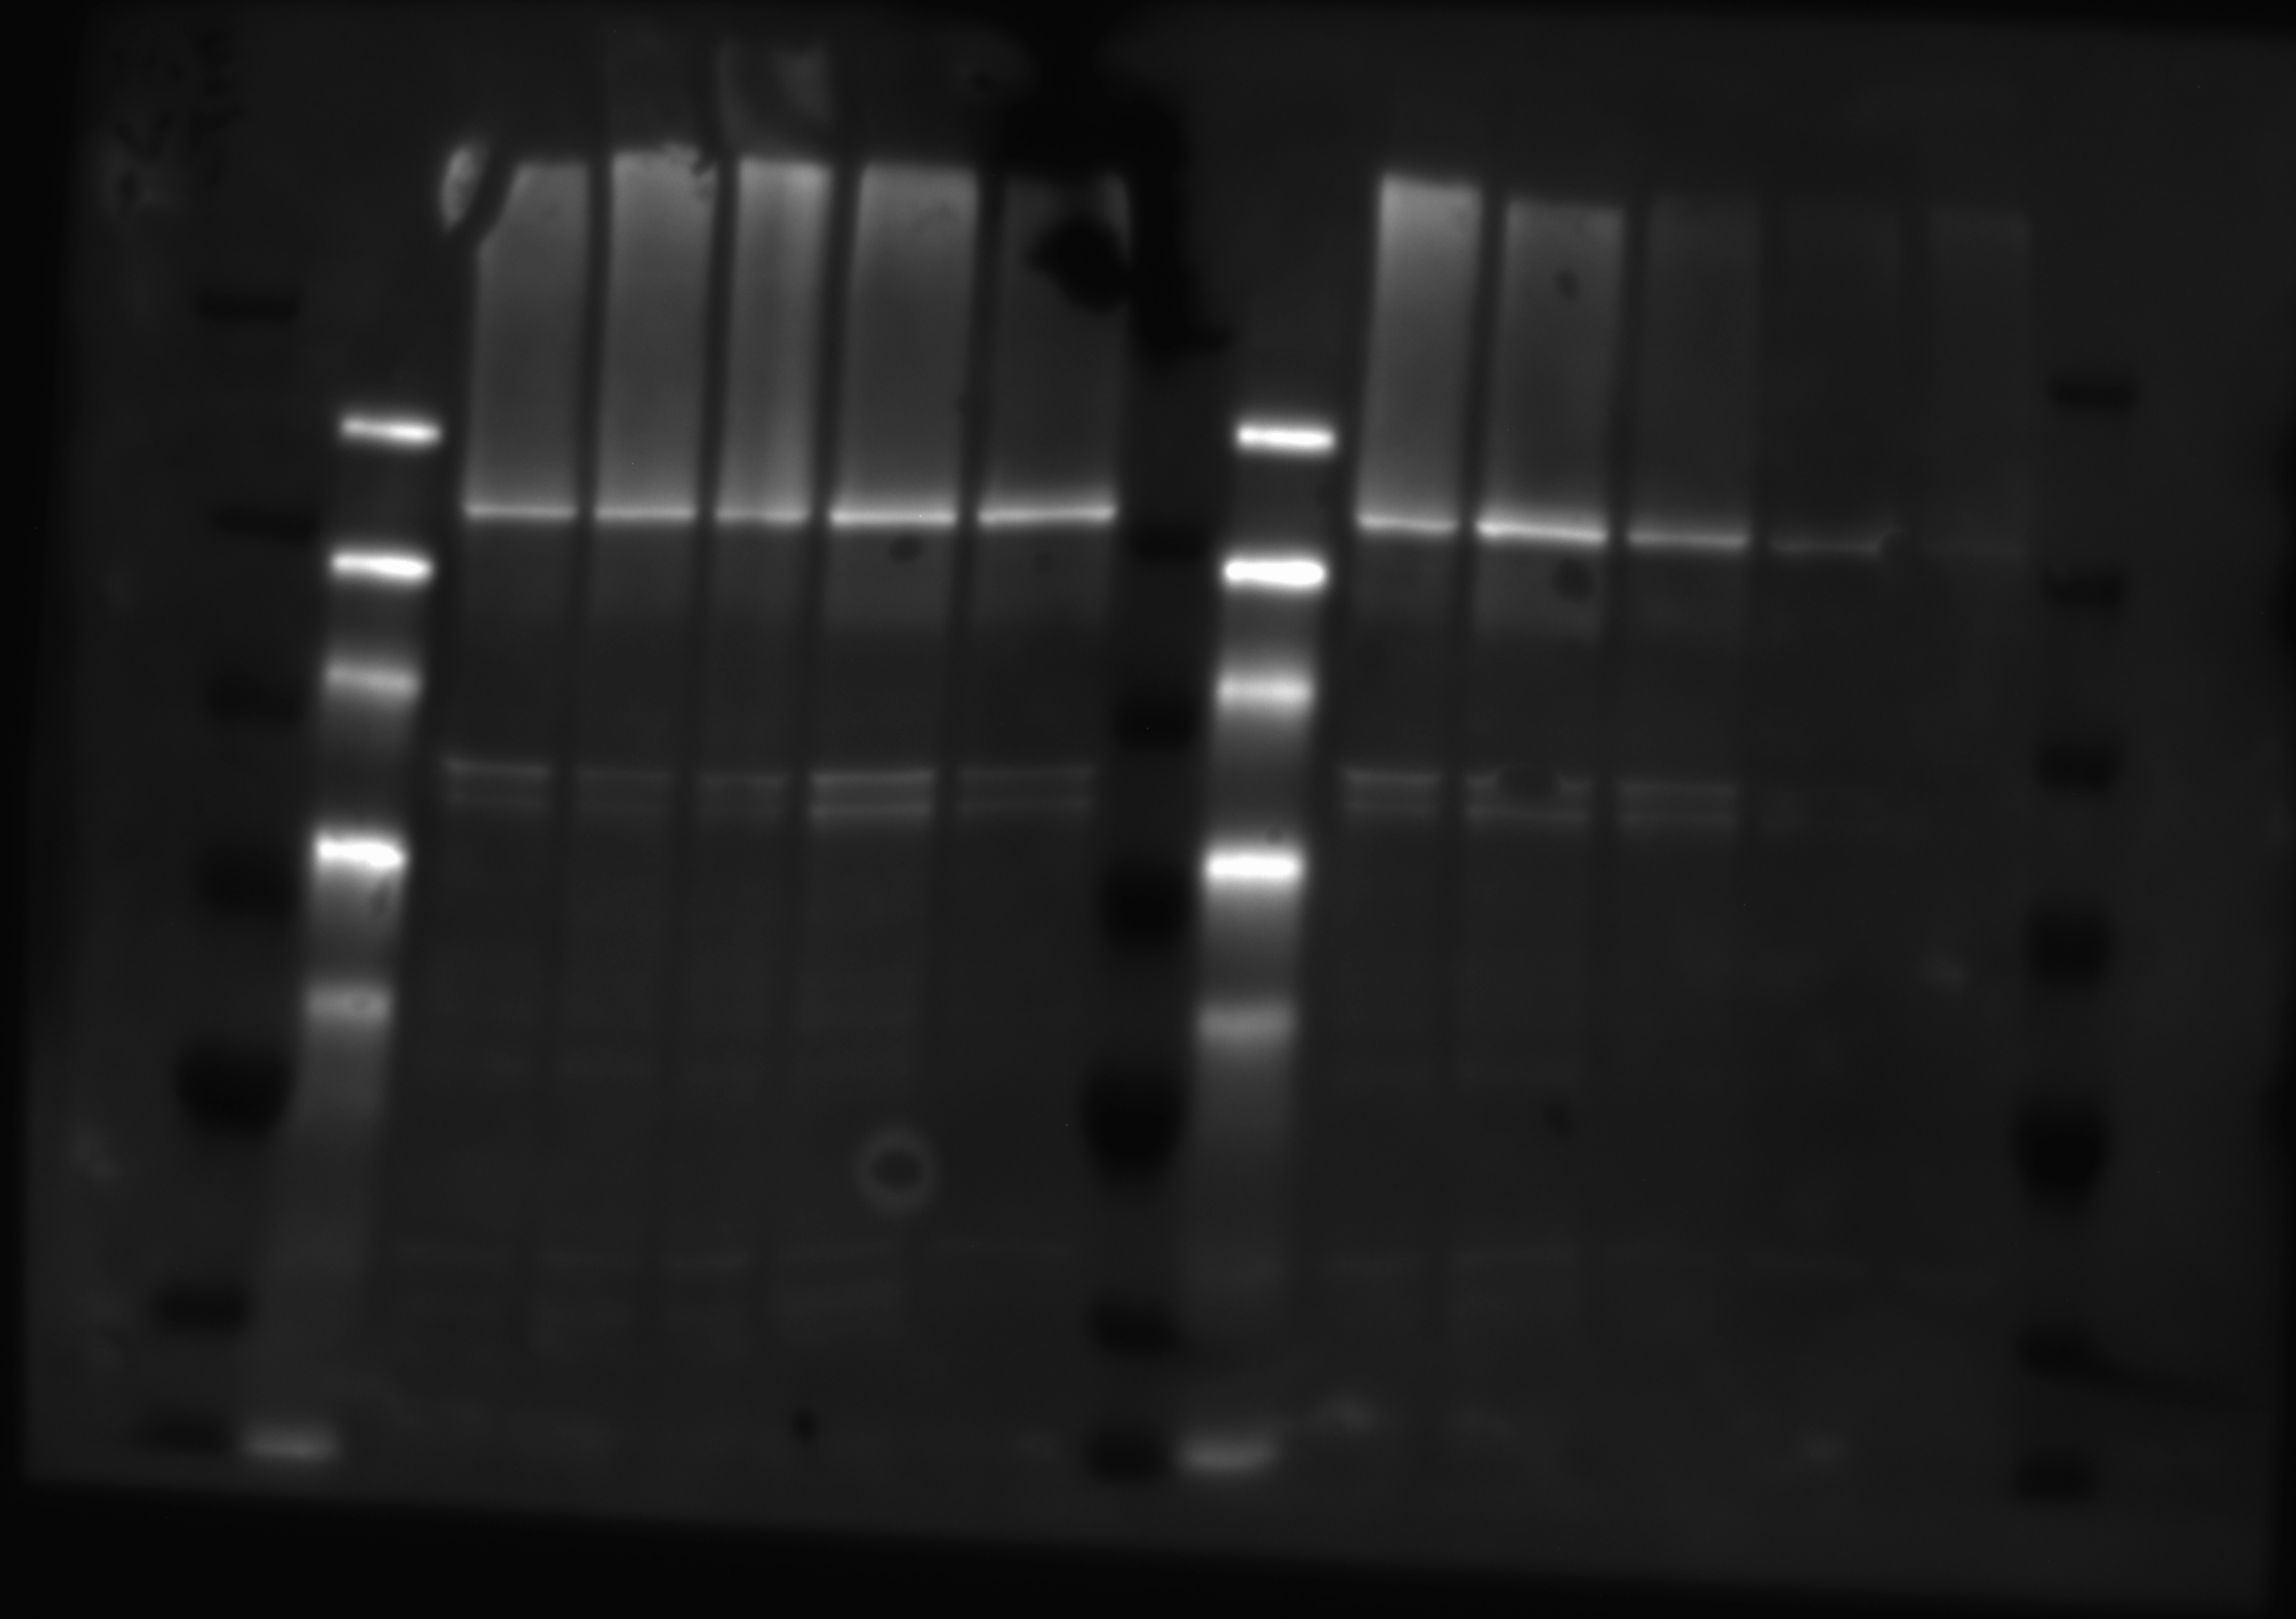

Figure 1B (Actin)

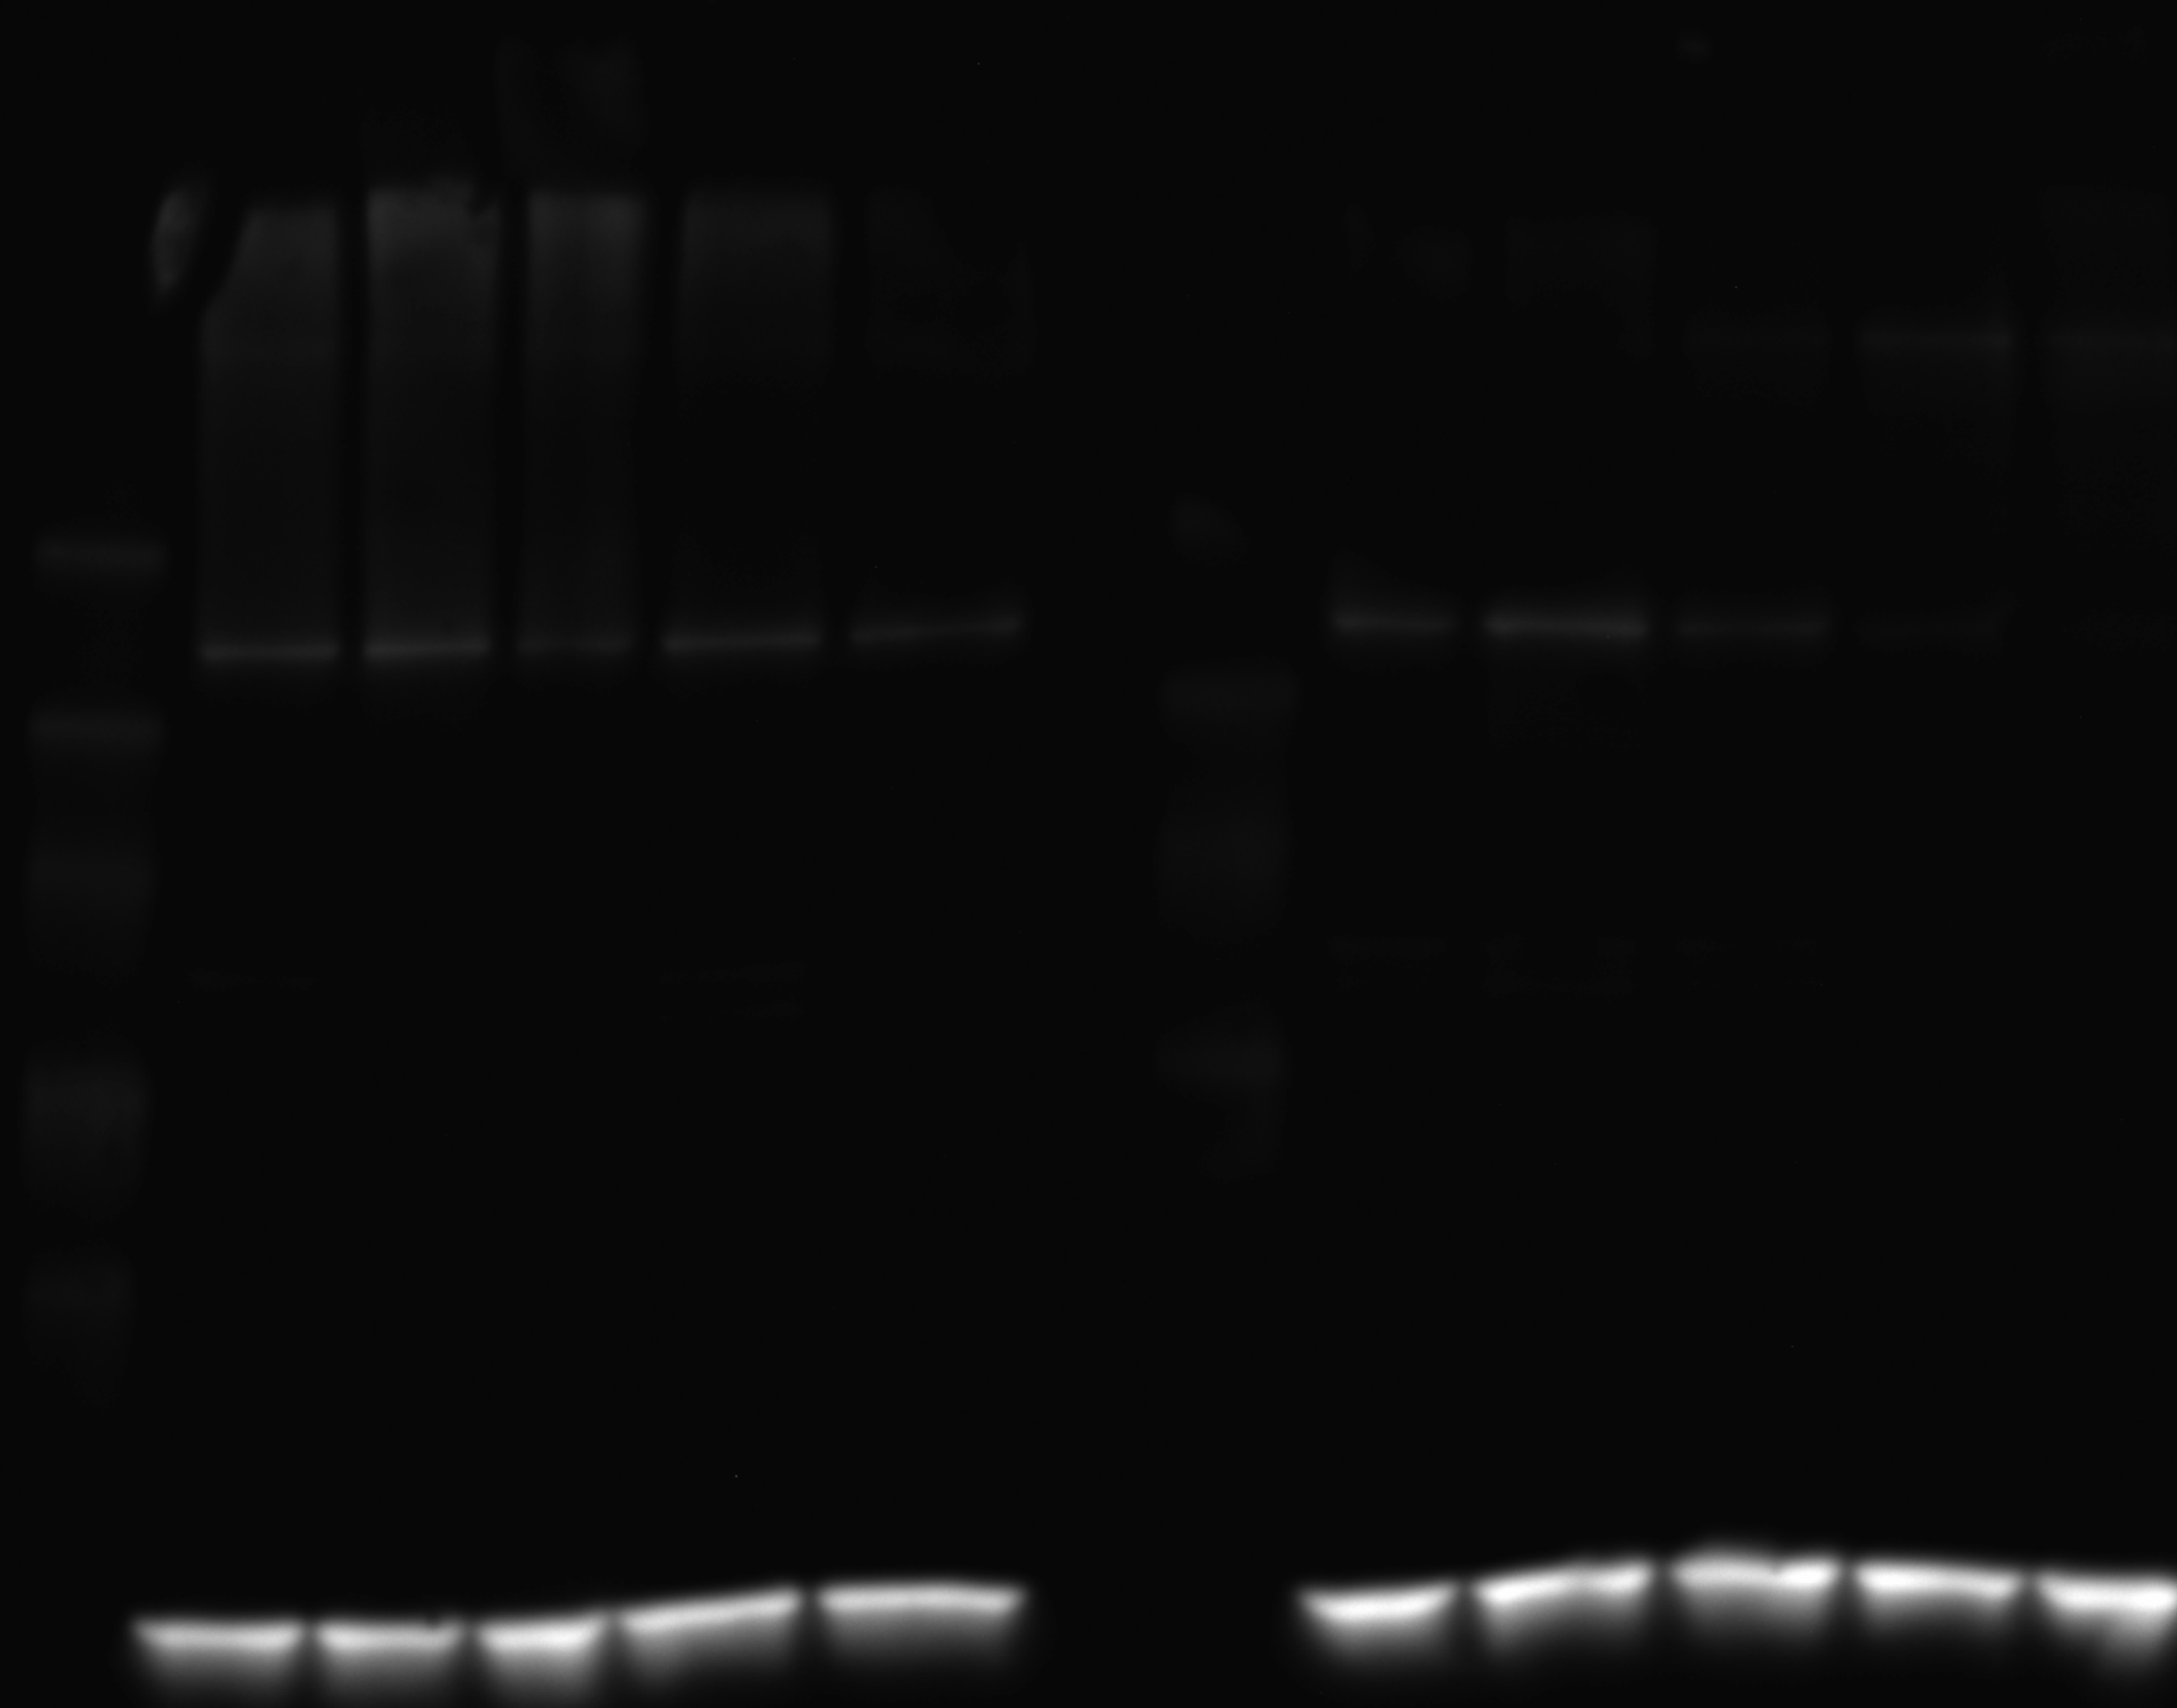

Figure S1A (V5-SPT16)

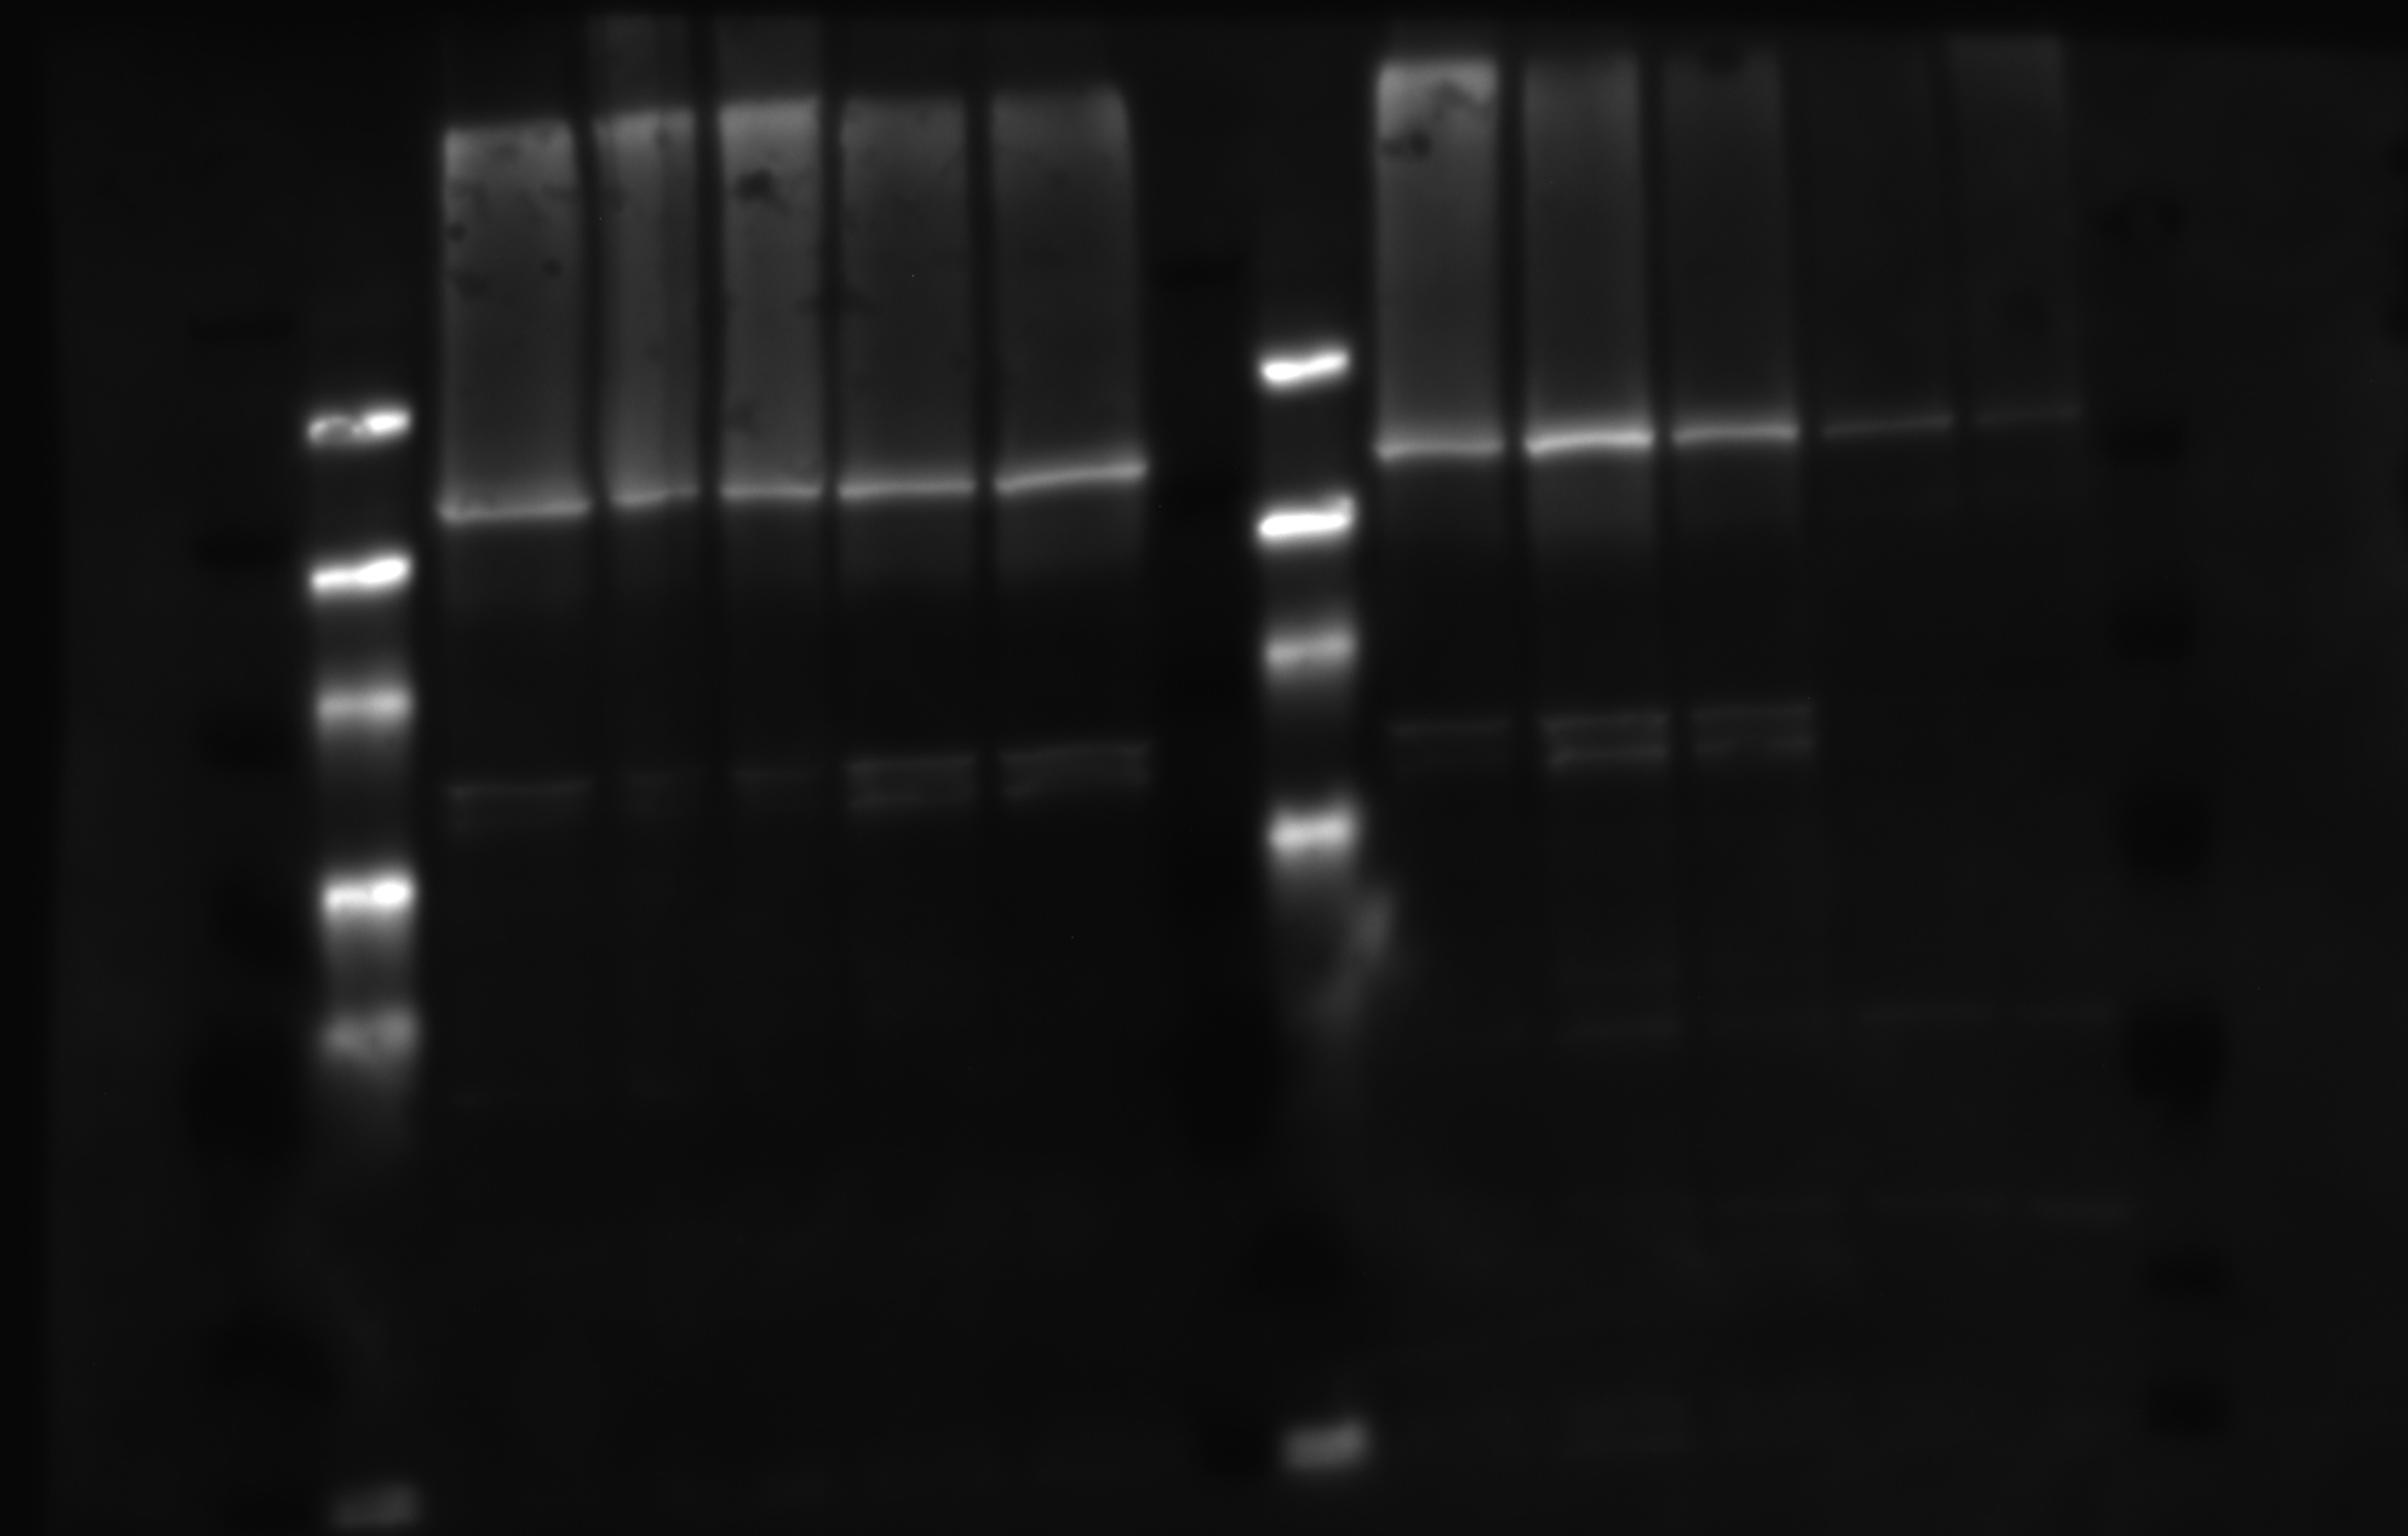

Figure S1A (Actin)

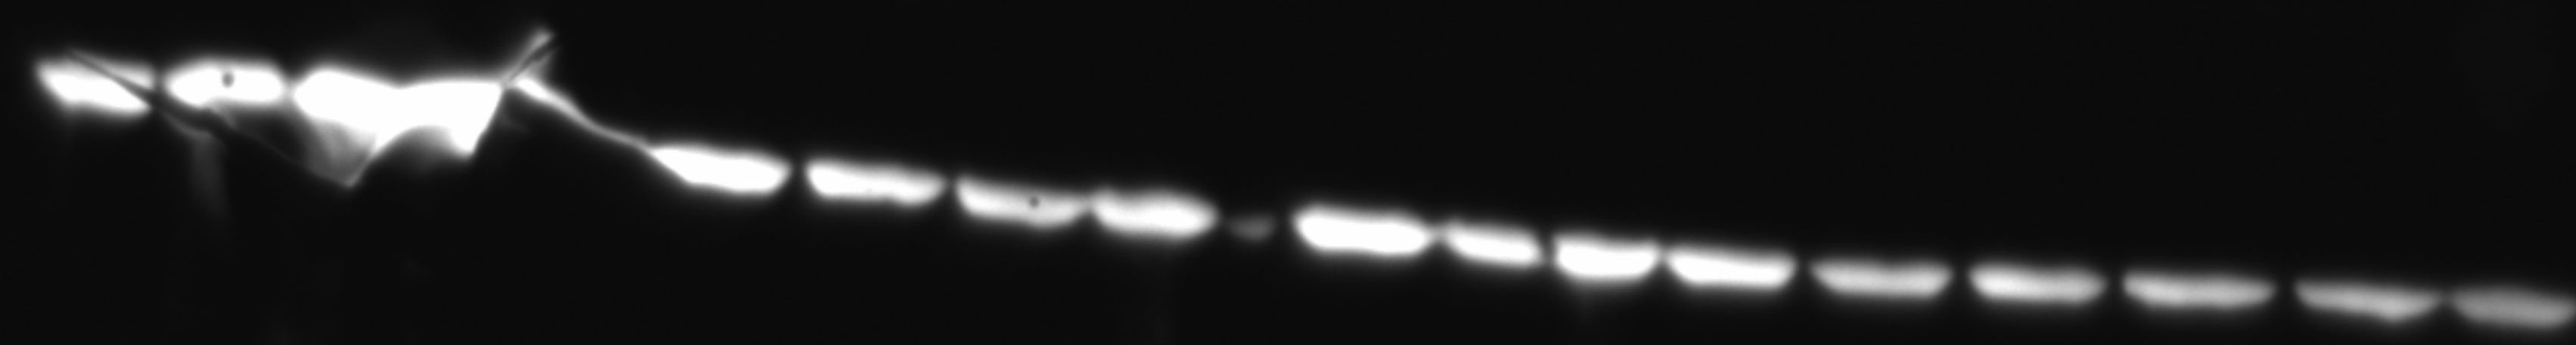

Figure S1B (OCT4)

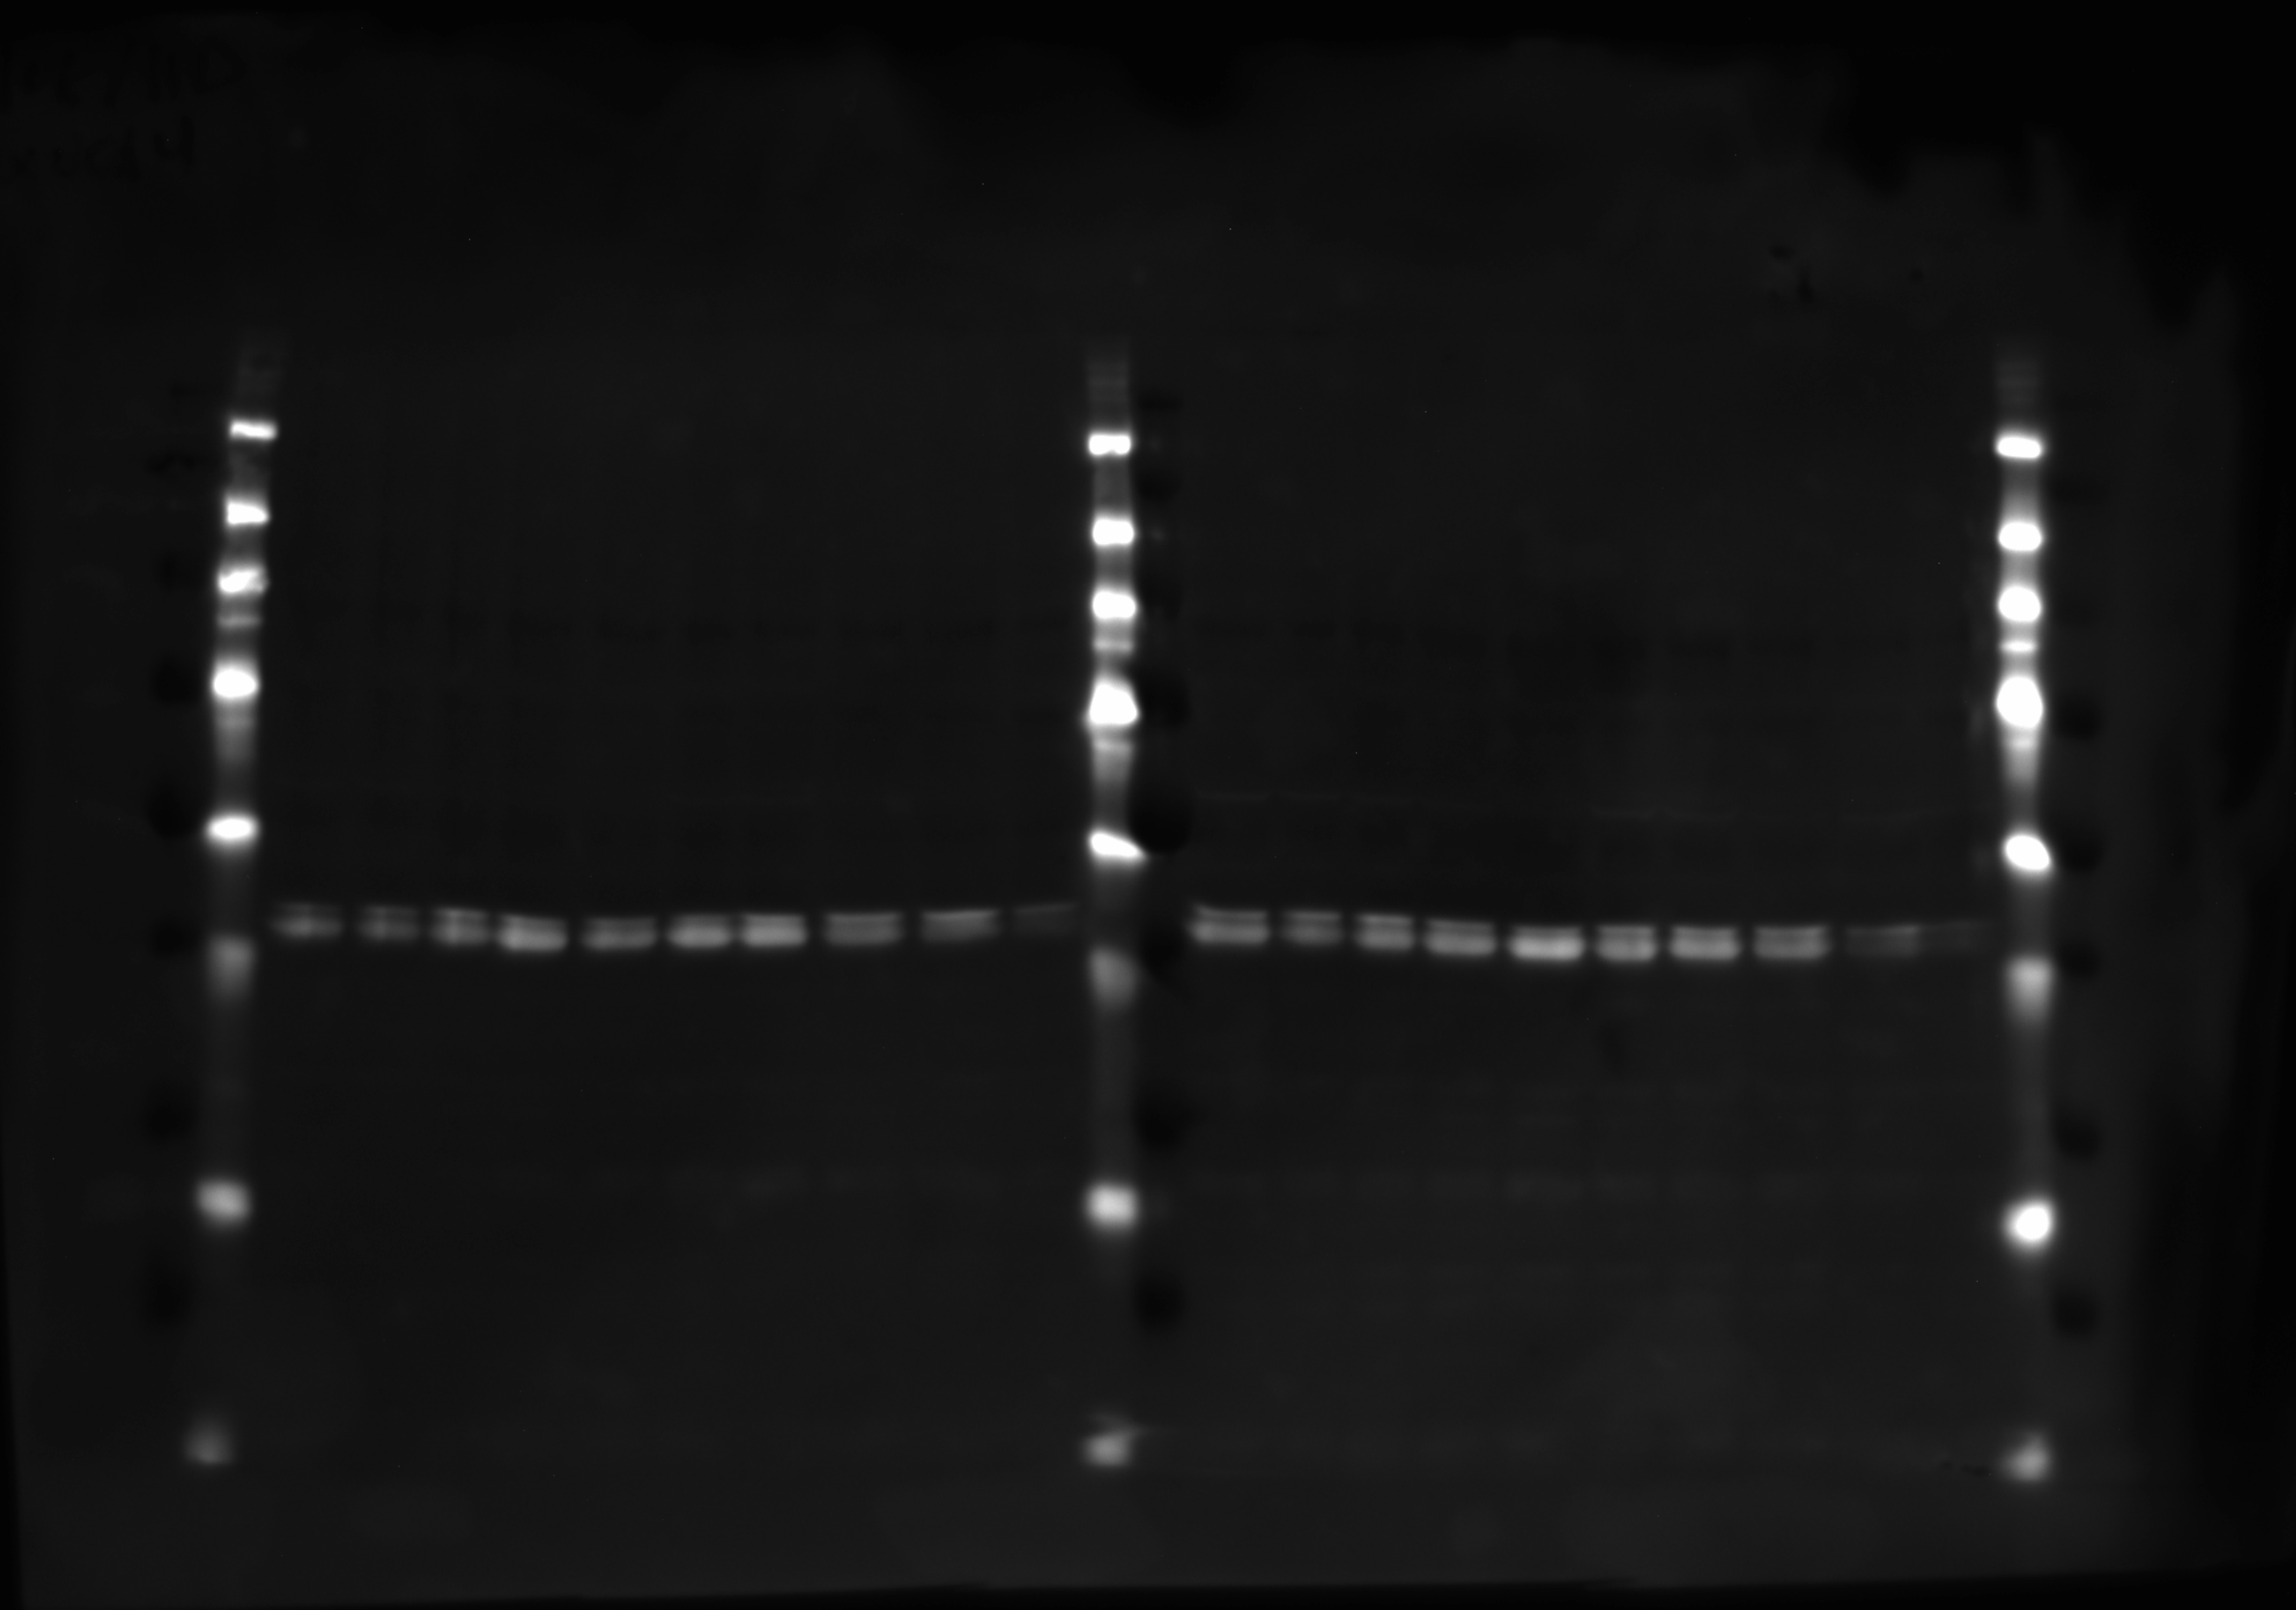

**Figure S1B (SSRP1 [top] and Actin [bottom])**

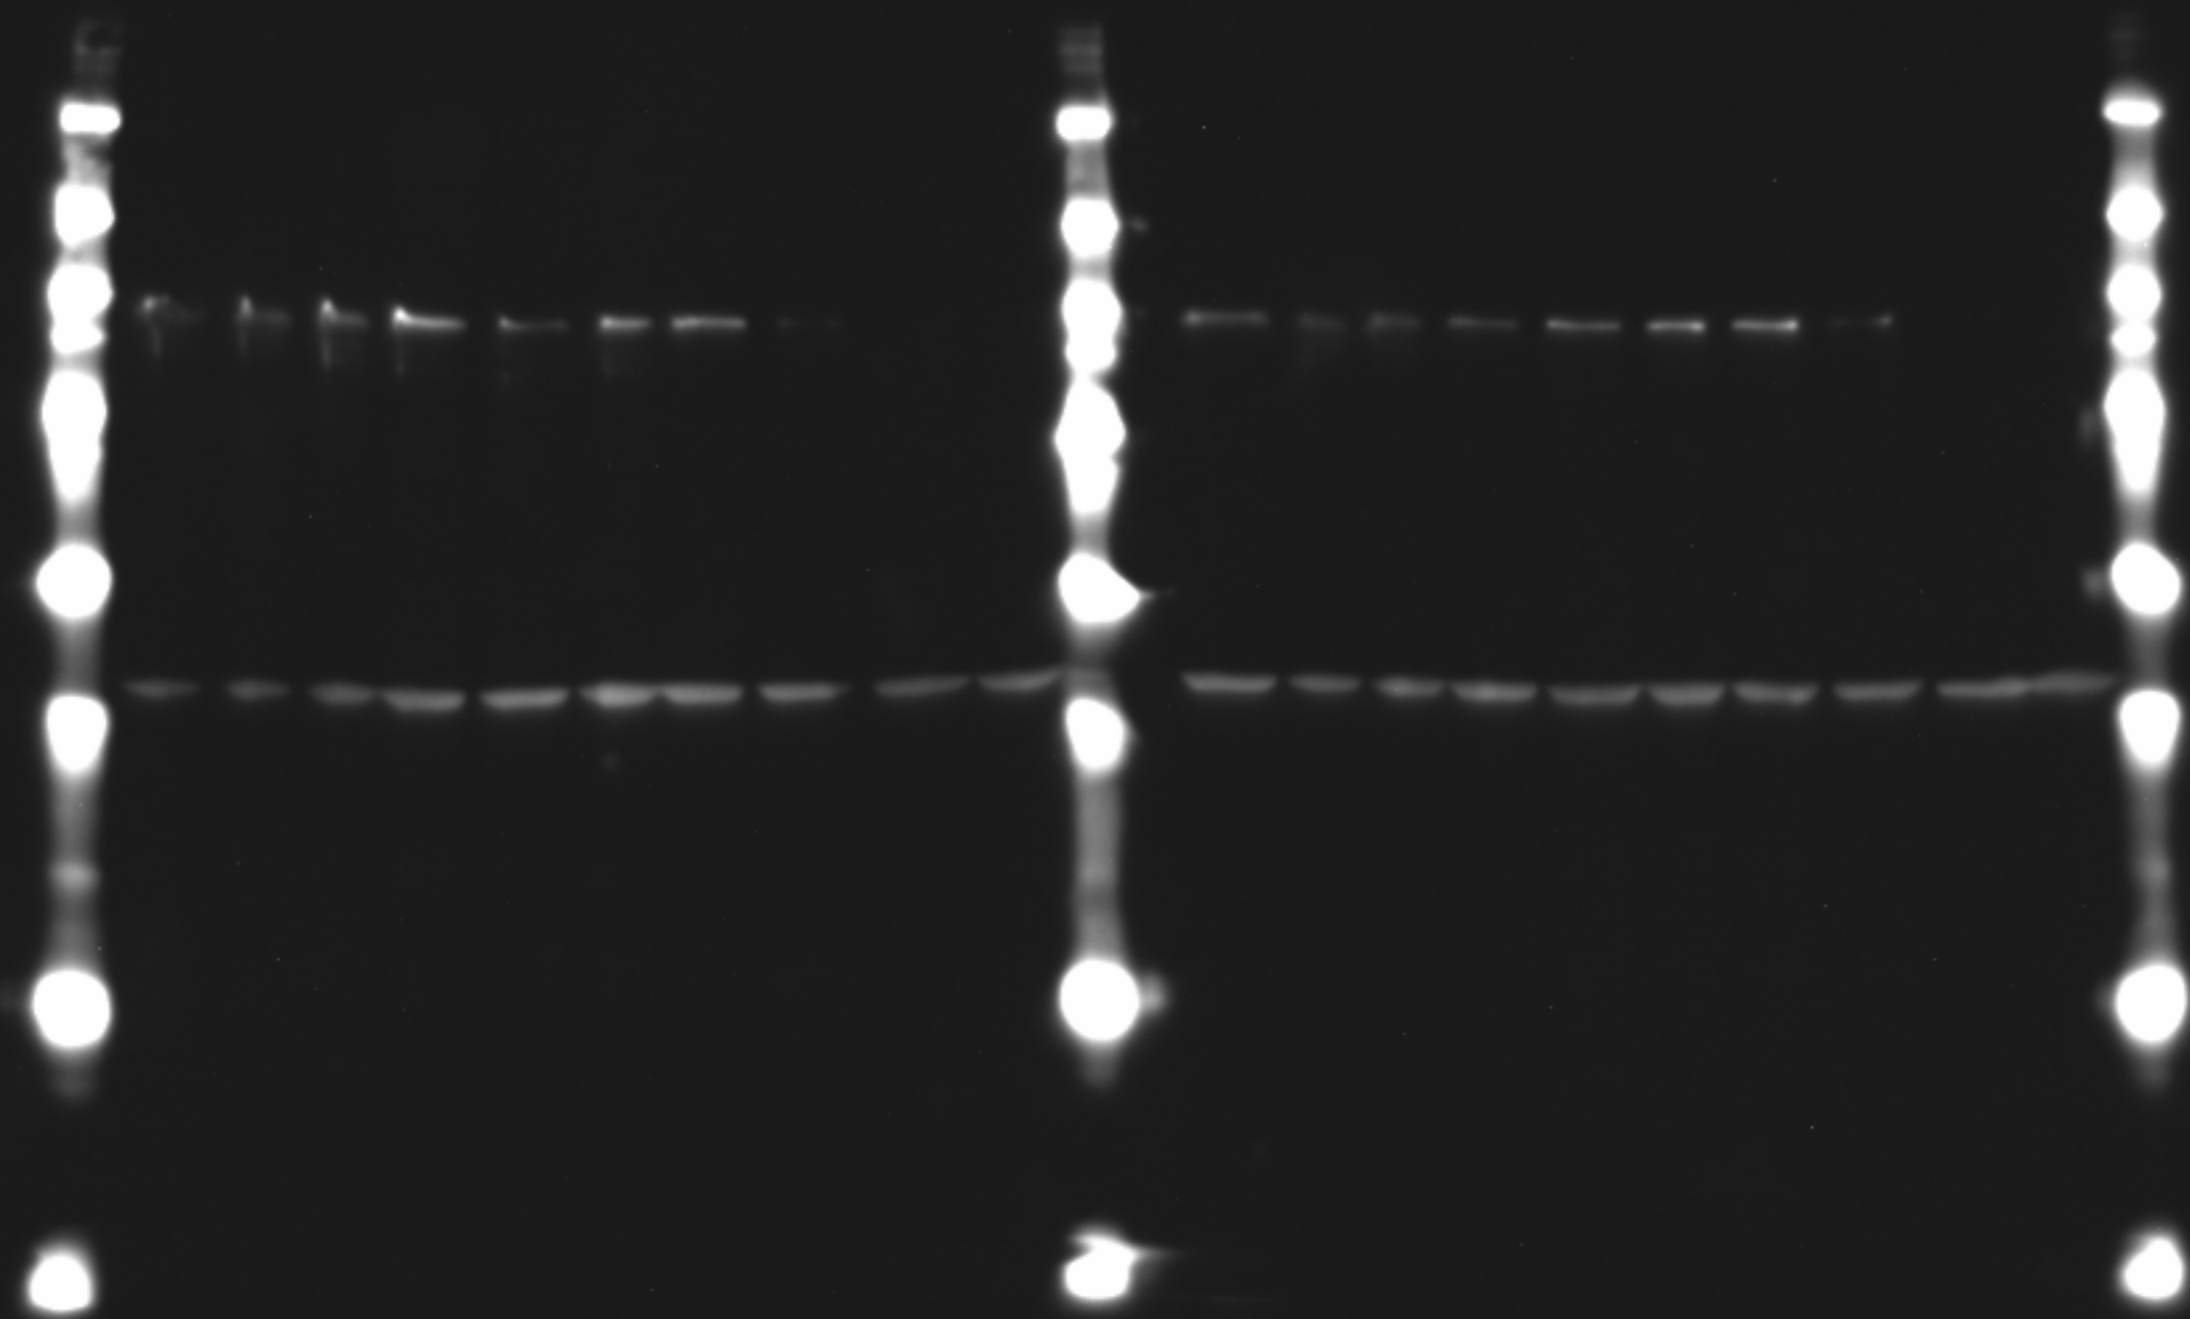

Figure S1C (V5-SPT16)

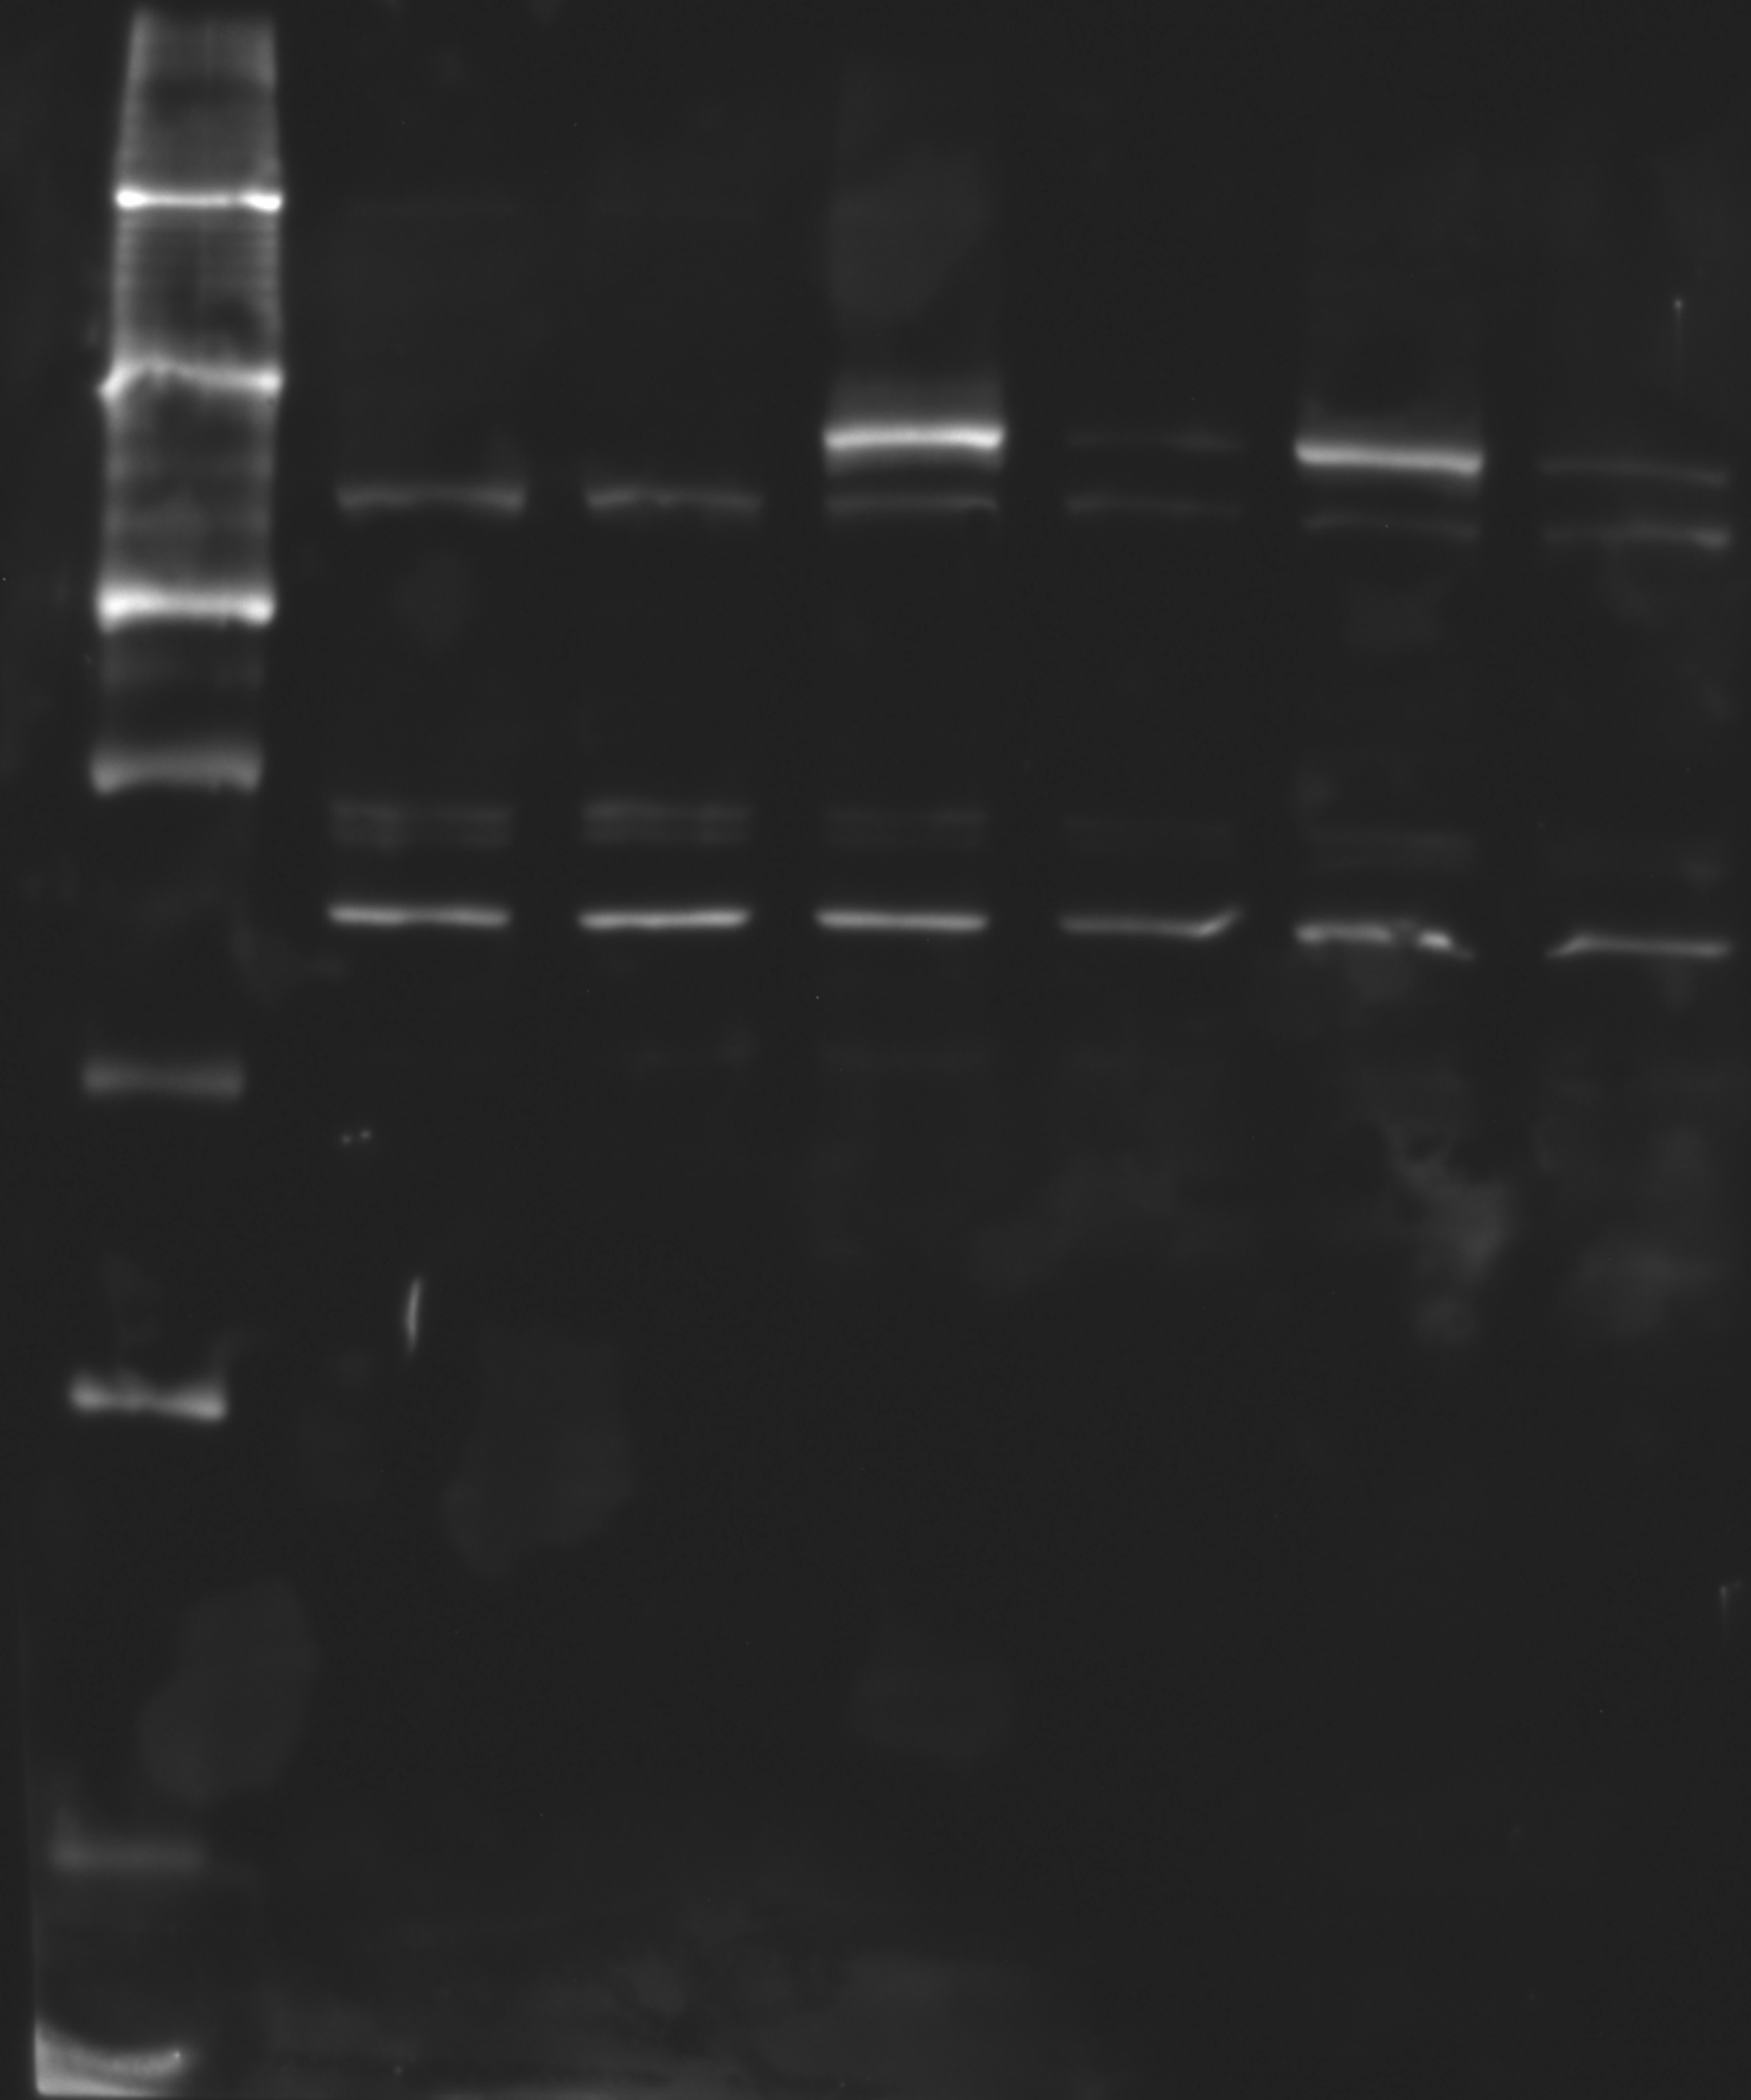

Figure S1C (SSRP1)

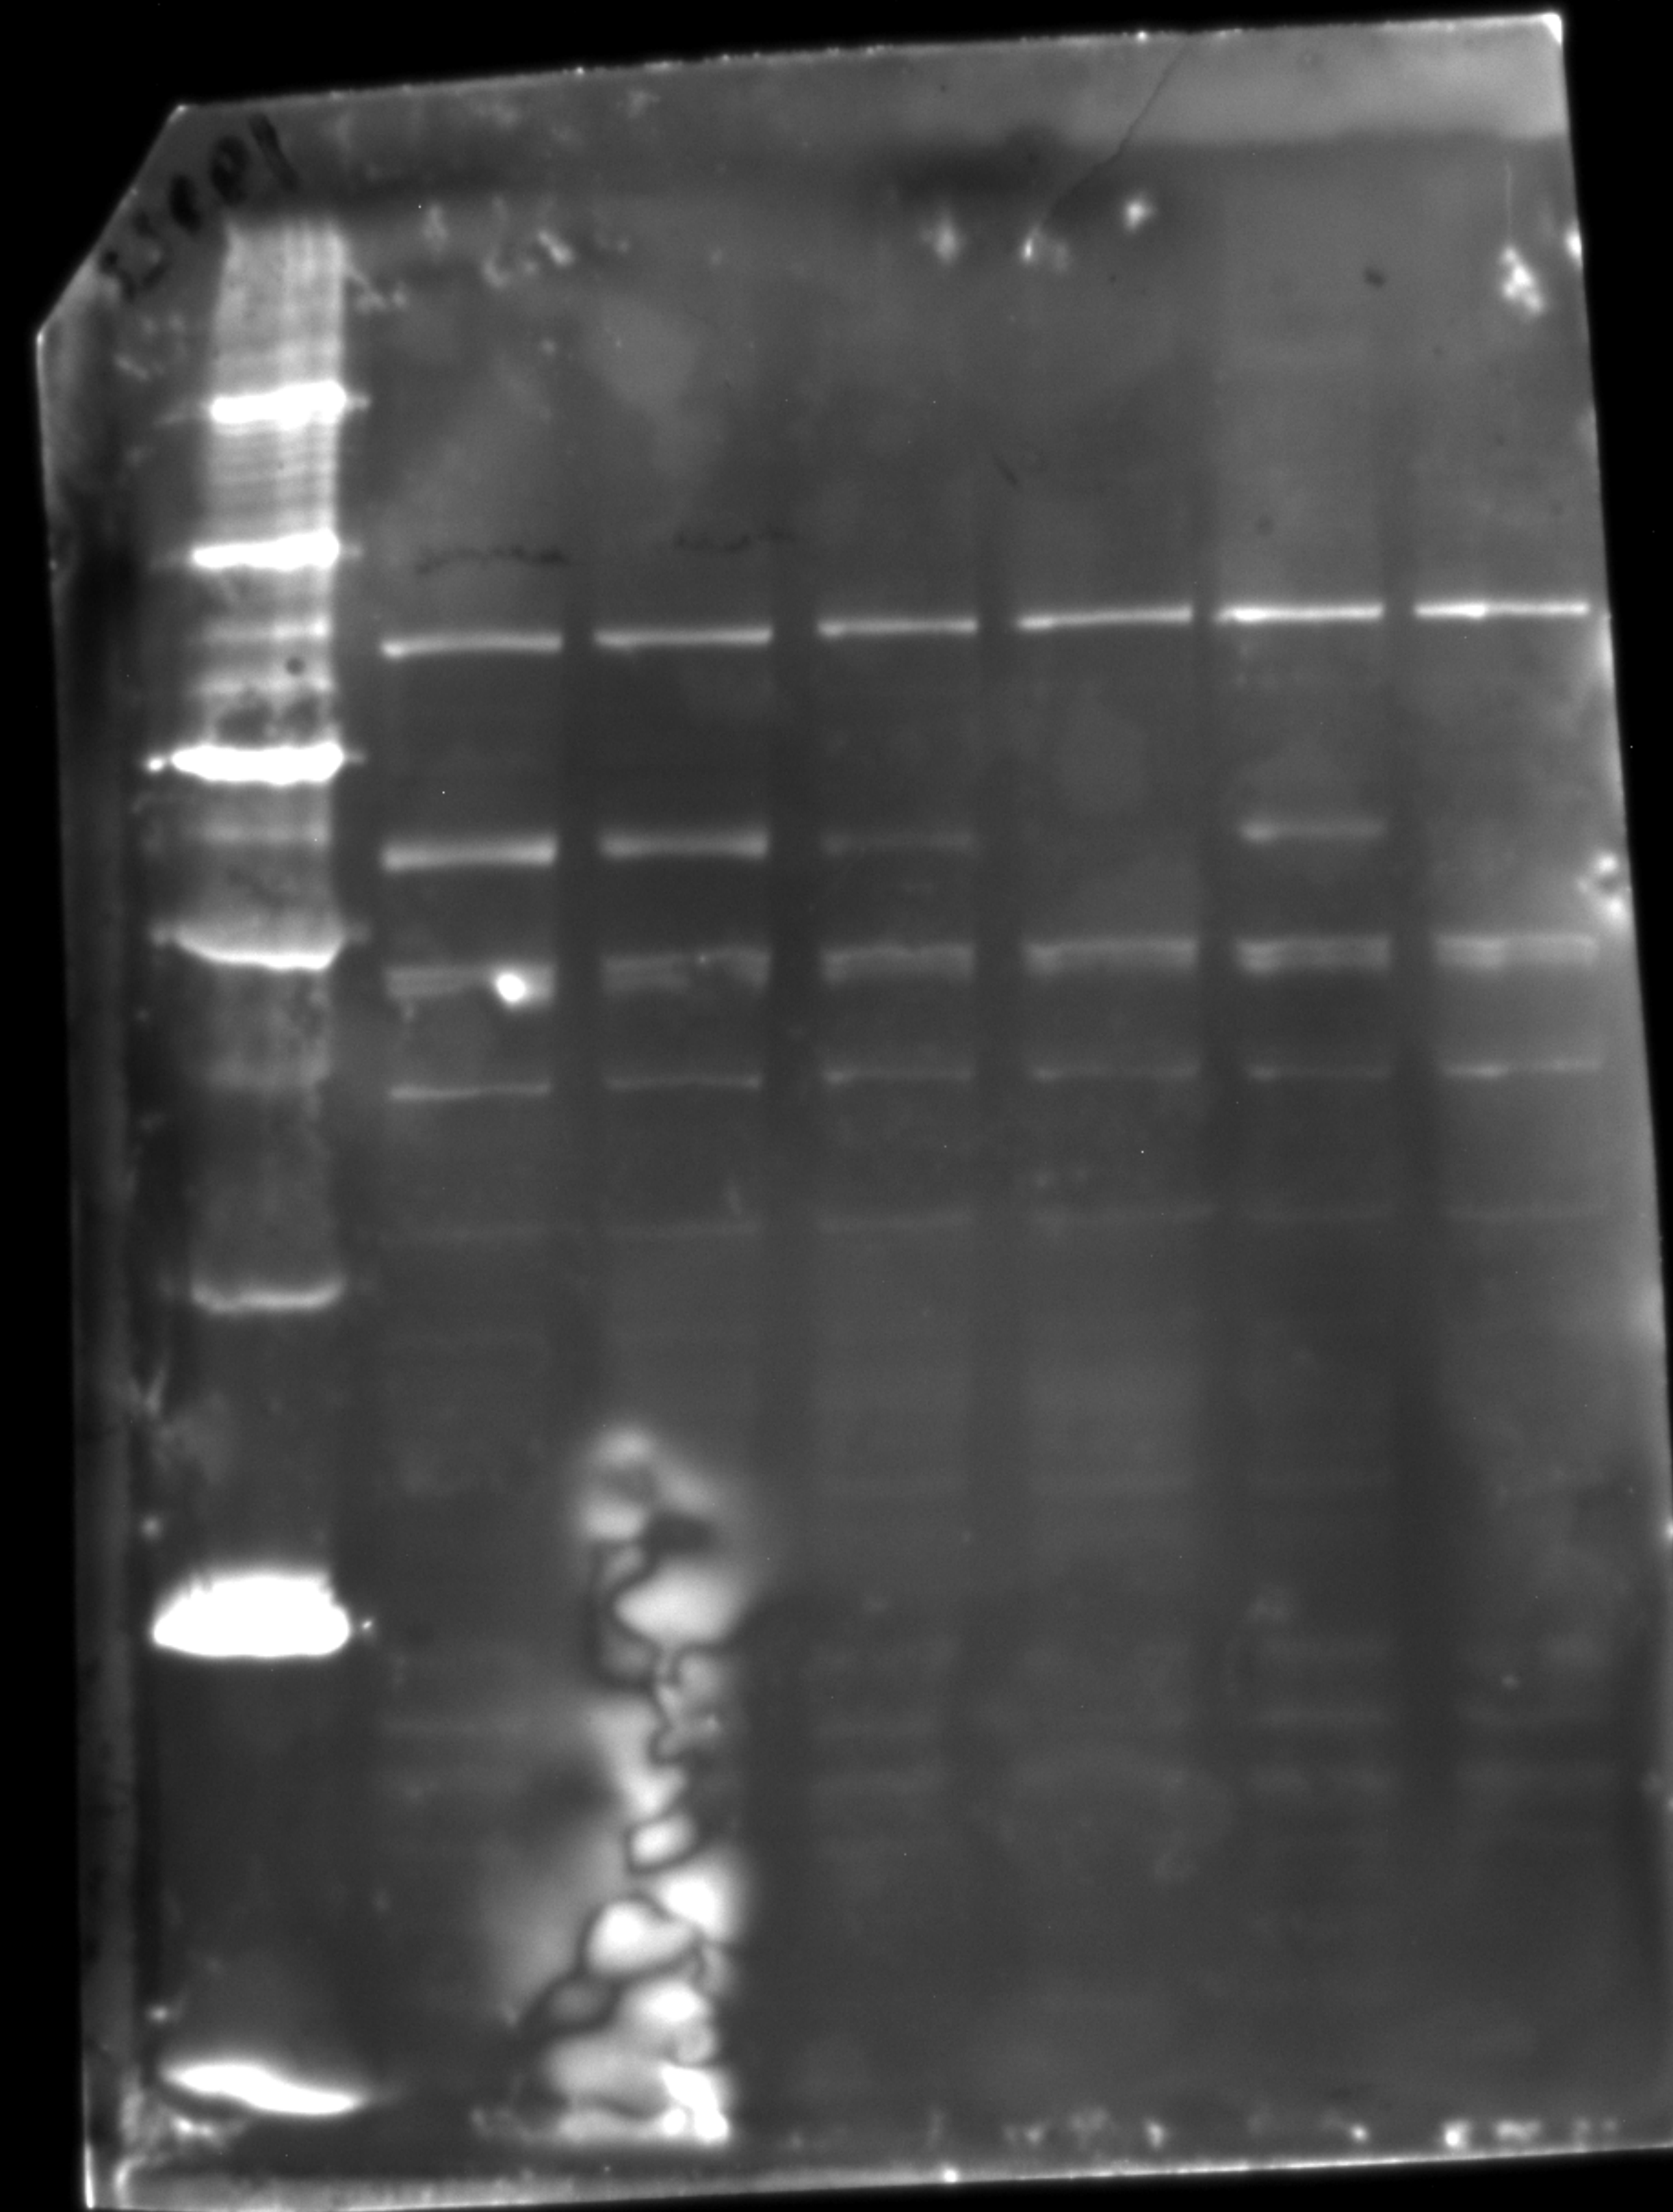



Figure S1C (Actin)

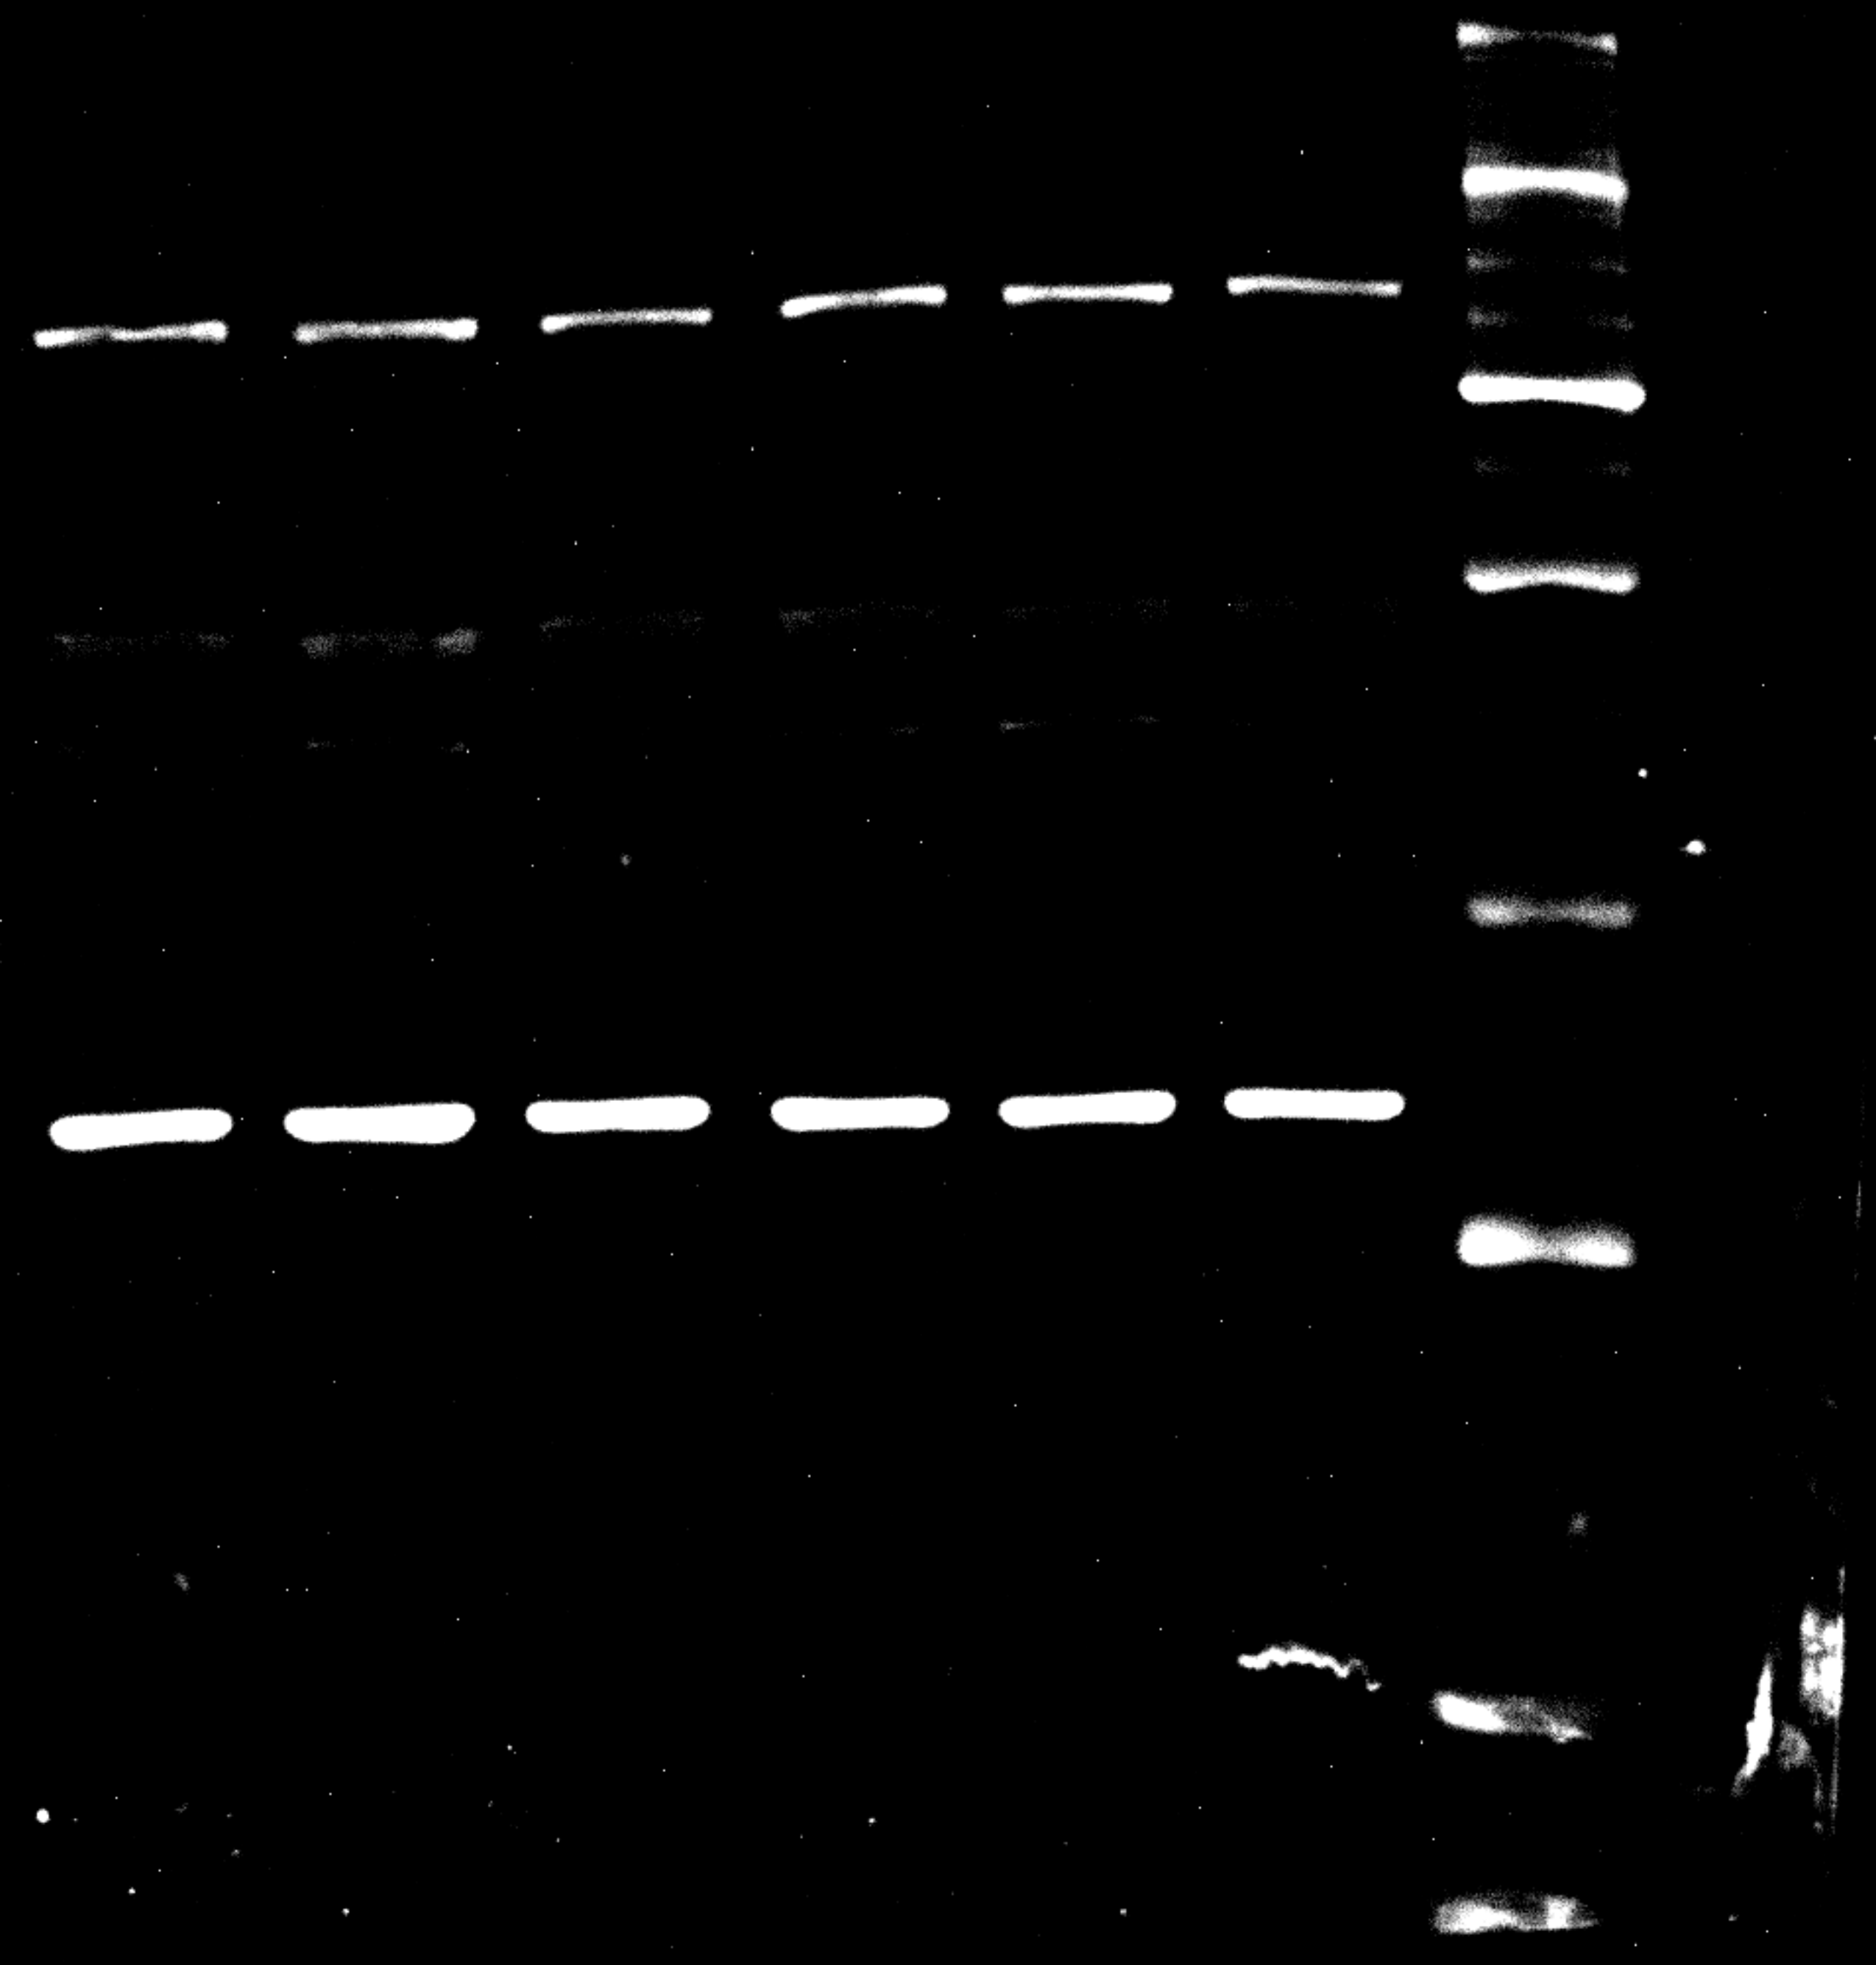

Supplement: 12915_2023_1669_MOESM3_ESM.pdf [file 12915_2023_1669_MOESM3_ESM.pdf]
